# Supplementary material for: Computational heterogeneity in the human mesencephalic dopamine system
Source: PubMed Central journal article supplement — Cogn Affect Behav Neurosci. 2013 Aug 13;13(4):747–56. doi: 10.3758/s13415-013-0191-5 (PMC3889258; doi:10.3758/s13415-013-0191-5), 2013-08-13
Supplement: 13415_2013_191_MOESM1_ESM.pdf [file 13415_2013_191_MOESM1_ESM.pdf]

1  
2  
3  
4  
5  
6  
7  
8  
9  
10  
11  
12  
13  
14  
15  
16  
17  
18  
19  
20  
21  
22  
23  
24  
25  
26  
27  
28  
29  
30  
31  
32  
33  
34  
35  
36  
37  
38  
39  
40  
41  
42  
43  
44  
45  
46  
47  
48  
49  
50  
51  
52  
53  
54  
55  
56  
57  
58  
59  
60

### A. signed TD error

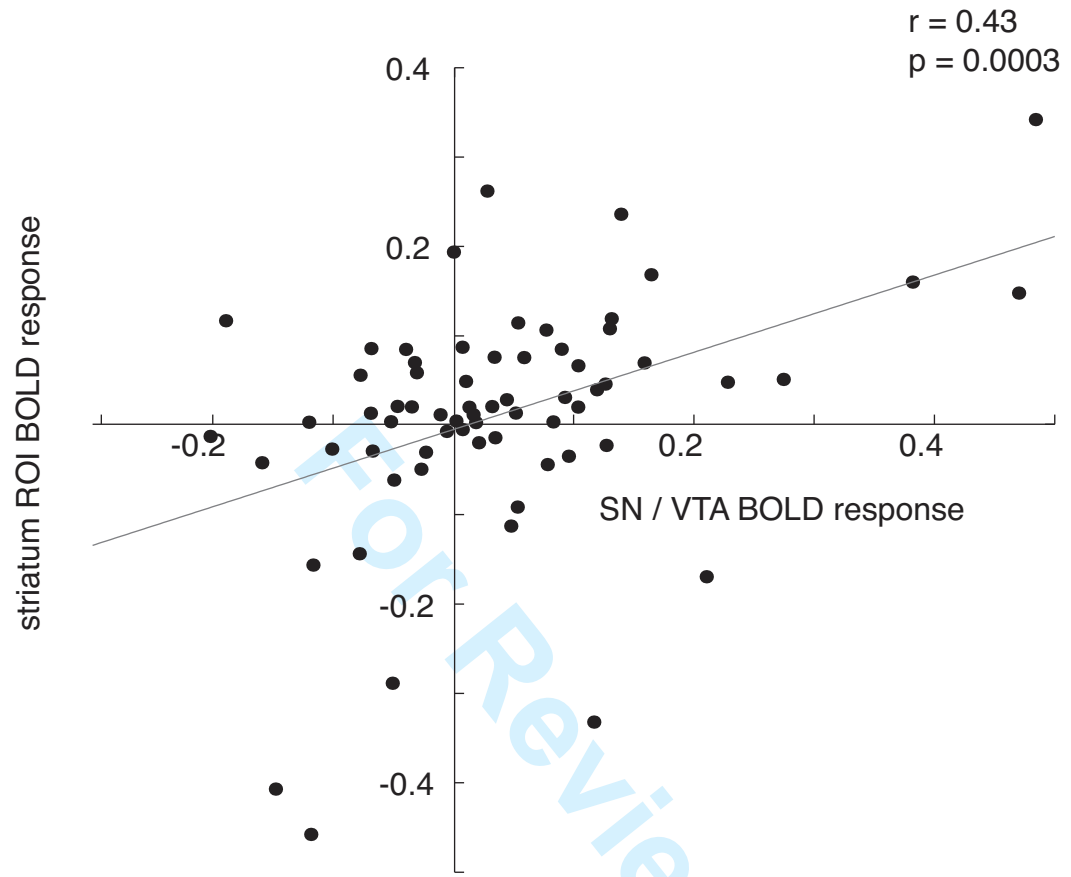

### B. fictive error

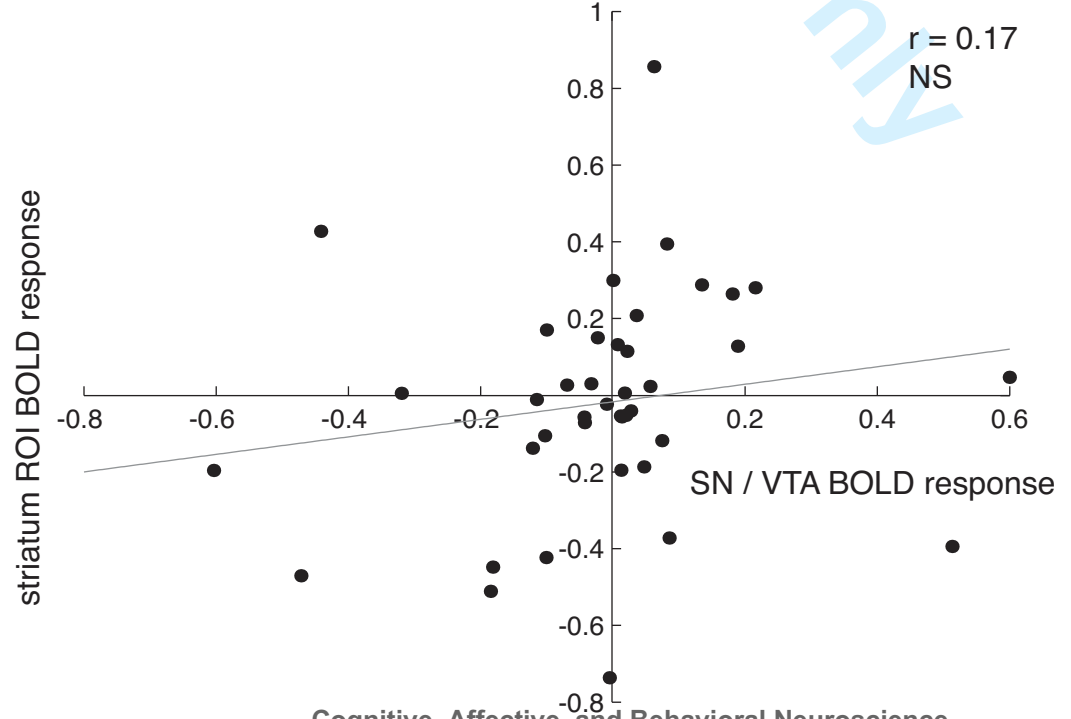

## Supplemental Material

### Supplemental Figure Legends

#### Figure S1.

**a** Striatal regions-of-interest (ROI) were created based on areas previously shown to code for signed TD errors and fictive errors over gains in the sequential investment task (Lohrenz, McCabe, Camerer, & Montague, 2007). The striatal ROI for signed TD errors was centered in the caudate ( $[\pm 9, 14, -2]$ , Talaraich coordinates), and all 67 participants had data in this region. Regression coefficients from both the striatal ROI and the midbrain SN and VTA regions encoding signed TD errors (Fig. 2A in the main text) were correlated; there was a significant positive linear relationship ( $r = 0.43$ ;  $p = 0.0003$ ).

**b** The striatal ROI for fictive errors over gains was centered in the putamen (centroids  $[\pm 8, 14, 4]$ , Talaraich coordinates), and 40 of the 67 participants had data in this region. Regression coefficients from both the striatal ROI and the midbrain SN and VTA regions encoding fictive errors (Fig. 2B in the main text) were correlated; there was a positive linear relationship, but it was not statistically significant ( $r = 0.17$ ;  $p = 0.3$ ).
